# Supplementary material for: Fabrication of bimetallic-doped materials derived from a Cu-based complex for enhanced dye adsorption and iodine capture
Source: Royal Society of Chemistry journal article supplement (doi:10.1039/d3dt02749j), 2023-01-01
Supplement: d3dt02749j1.pdf [file d3dt02749j1.pdf]

## Fabrication of bimetallic-doped materials derived from a Cu-based complex for enhanced dye adsorption and iodine capture

Ai-Ai Yang,<sup>a</sup> Jian-Peng Cui,<sup>a</sup> Yu Liu,<sup>a\*</sup> Xiao-Sa Zhang,<sup>a</sup> Ze-Bang Sun,<sup>a</sup> Nan Luo,<sup>a</sup>

Wen-Ze Li,<sup>a\*</sup> and Jian Luan<sup>b\*</sup>

<sup>a</sup> College of Science, Shenyang University of Chemical Technology, Shenyang, 110142, P. R. China

<sup>b</sup> College of Sciences, Northeastern University, Shenyang, 110819, P. R. China

E-mails: [wzli@syuct.edu.cn](mailto:wzli@syuct.edu.cn) (W. Z. Li); [2010044@stu.neu.edu.cn](mailto:2010044@stu.neu.edu.cn) (J. Luan)

**Table S1** Selected bond distances (Å) and angles (°) for complex **1**.

|               |            |                    |            |
|---------------|------------|--------------------|------------|
| Cu(1)–O(3)#1  | 1.950(4)   | O(11)–Cu(2)–O(6)   | 89.68(17)  |
| Cu(1)–O(4)#2  | 1.957(4)   | O(9)–Cu(2)–O(8)#1  | 88.62(16)  |
| Cu(1)–O(2)#3  | 1.970(4)   | O(11)–Cu(2)–O(8)#1 | 167.24(15) |
| Cu(1)–O(1)    | 1.976(3)   | O(6)–Cu(2)–O(8)#1  | 90.47(17)  |
| Cu(1)–N(1)    | 2.184(4)   | O(9)–Cu(2)–N(2)    | 103.51(17) |
| Cu(1)–Cu(1)#3 | 2.5935(10) | O(11)–Cu(2)–N(2)   | 104.04(17) |
| O(1W)–Cu(3)   | 2.134(3)   | O(6)–Cu(2)–N(2)    | 88.99(17)  |
| Cu(2)–O(9)    | 1.964(4)   | O(8)#1–Cu(2)–N(2)  | 88.72(17)  |
| Cu(2)–O(11)   | 1.973(4)   | O(9)–Cu(2)–Cu(3)   | 86.89(10)  |
| Cu(2)–O(6)    | 1.981(4)   | O(11)–Cu(2)–Cu(3)  | 86.35(10)  |
| Cu(2)–O(8)#1  | 1.995(4)   | O(6)–Cu(2)–Cu(3)   | 80.60(11)  |
| Cu(2)–N(2)    | 2.180(4)   | O(8)#1–Cu(2)–Cu(3) | 81.09(10)  |
| Cu(2)–Cu(3)   | 2.5933(8)  | N(2)–Cu(2)–Cu(3)   | 165.31(14) |
| O(2)–Cu(1)#3  | 1.970(4)   | C(19)–O(2)–Cu(1)#3 | 122.7(3)   |
| Cu(3)–O(10)   | 1.932(4)   | C(16)–N(2)–Cu(2)   | 119.8(4)   |
| Cu(3)–O(12)   | 1.956(3)   | C(17)–N(2)–Cu(2)   | 117.3(4)   |
| Cu(3)–O(5)    | 1.976(4)   | O(10)–Cu(3)–O(12)  | 92.19(15)  |
| Cu(3)–O(7)#1  | 1.984(3)   | O(10)–Cu(3)–O(5)   | 170.16(15) |
| O(3)–Cu(1)#4  | 1.950(4)   | O(12)–Cu(3)–O(5)   | 88.20(15)  |
| O(4)–Cu(1)#2  | 1.957(4)   | O(10)–Cu(3)–O(7)#1 | 89.49(16)  |
| O(7)–Cu(3)#4  | 1.984(3)   | O(12)–Cu(3)–O(7)#1 | 169.78(14) |

|                      |            |                    |            |
|----------------------|------------|--------------------|------------|
| O(8)–Cu(2)#4         | 1.995(4)   | O(5)–Cu(3)–O(7)#1  | 88.43(15)  |
| O(3)#1–Cu(1)–O(4)#2  | 169.33(14) | O(10)–Cu(3)–O(1W)  | 95.29(14)  |
| O(3)#1–Cu(1)–O(2)#3  | 89.50(16)  | O(12)–Cu(3)–O(1W)  | 96.88(13)  |
| O(4)#2–Cu(1)–O(2)#3  | 89.83(16)  | O(5)–Cu(3)–O(1W)   | 94.42(14)  |
| O(3)#1–Cu(1)–O(1)    | 89.12(17)  | O(7)#1–Cu(3)–O(1W) | 93.00(14)  |
| O(4)#2–Cu(1)–O(1)    | 89.59(17)  | O(10)–Cu(3)–Cu(2)  | 82.19(10)  |
| O(2)#3–Cu(1)–O(1)    | 169.44(14) | O(12)–Cu(3)–Cu(2)  | 82.21(10)  |
| O(3)#1–Cu(1)–N(1)    | 94.59(15)  | O(5)–Cu(3)–Cu(2)   | 88.13(10)  |
| O(4)#2–Cu(1)–N(1)    | 96.07(15)  | O(7)#1–Cu(3)–Cu(2) | 88.03(10)  |
| O(2)#3–Cu(1)–N(1)    | 96.51(14)  | O(1W)–Cu(3)–Cu(2)  | 177.27(10) |
| O(1)–Cu(1)–N(1)      | 94.04(14)  | C(26)–O(3)–Cu(1)#4 | 122.9(3)   |
| O(3)#1–Cu(1)–Cu(1)#3 | 84.79(10)  | C(26)–O(4)–Cu(1)#2 | 123.1(3)   |
| O(4)#2–Cu(1)–Cu(1)#3 | 84.55(10)  | C(27)–O(5)–Cu(3)   | 118.3(3)   |
| O(2)#3–Cu(1)–Cu(1)#3 | 84.59(10)  | C(27)–O(6)–Cu(2)   | 127.1(3)   |
| O(1)–Cu(1)–Cu(1)#3   | 84.86(10)  | C(32)–O(7)–Cu(3)#4 | 118.8(3)   |
| N(1)–Cu(1)–Cu(1)#3   | 178.74(12) | C(32)–O(8)–Cu(2)#4 | 127.0(3)   |
| C(5)–N(1)–Cu(1)      | 124.1(3)   | C(35)–O(9)–Cu(2)   | 119.1(3)   |
| C(1)–N(1)–Cu(1)      | 118.8(3)   | C(35)–O(10)–Cu(3)  | 126.1(3)   |
| C(19)–O(1)–Cu(1)     | 122.7(3)   | C(42)–O(11)–Cu(2)  | 119.1(3)   |
| O(9)–Cu(2)–O(11)     | 88.48(17)  | C(42)–O(12)–Cu(3)  | 125.1(3)   |
| O(9)–Cu(2)–O(6)      | 167.44(15) |                    |            |

Symmetry codes: #1  $x - 1, y, z$ ; #2  $-x + 2, -y - 1, -z + 1$ ; #3  $-x + 1, -y - 1, -z + 1$ ; #4  $x + 1, y, z$ .

**Table S2** Hydrogen bonding geometries (Å, °) of complex **1**.

| D–H···A                       | D–H  | H···A | D···A  | D–H···A |
|-------------------------------|------|-------|--------|---------|
| O2W–H2WB···O11 <sup>i</sup>   | 0.85 | 2.37  | 3.1852 | 162     |
| N3–H3A···O14 <sup>ii</sup>    | 0.86 | 2.08  | 2.9126 | 161     |
| O3W–H3WA···O14 <sup>ii</sup>  | 0.85 | 1.99  | 2.7996 | 159     |
| O3W–H3WB···O13 <sup>iii</sup> | 0.85 | 1.87  | 2.6848 | 161     |
| N4–H4B···O2W <sup>iii</sup>   | 0.86 | 2.08  | 2.9001 | 159     |

Symmetry codes: <sup>i</sup>  $x, -1 + y, z$ ; <sup>ii</sup>  $-x, 1 - y, -z$ ; <sup>iii</sup>  $1 - x, 1 - y, -z$ .

**Table S3** Adsorption capacities of different adsorbents for CR.

| Materials                                                     | Material weigh (mg) | C <sub>0</sub> (mg g <sup>-1</sup> ) | Adsorption capacity (mg g <sup>-1</sup> ) | Adsorption time (min) | Ref.      |
|---------------------------------------------------------------|---------------------|--------------------------------------|-------------------------------------------|-----------------------|-----------|
| CS-VTM composite                                              | 80                  | 100                                  | 62.20                                     | 2880                  | S1        |
| f-MWCNTs                                                      | 20                  | 400                                  | 148.00                                    | 150                   | S2        |
| MWCNTs                                                        | 5                   | 10                                   | 67.30                                     | 10                    | S3        |
| C-Mo-1                                                        | 5                   | 80                                   | 1304.00                                   | 240                   | S4        |
| Fe <sub>x</sub> Co <sub>3-x</sub> O <sub>4</sub> nanoparticle | 50                  | 20                                   | 126.86                                    | 240                   | S5        |
| BMC-0.05                                                      | 50                  | 100                                  | 290.48                                    | 60                    | S6        |
| C-N-1                                                         | 10                  | 80                                   | 1357.00                                   | 240                   | This work |
| C-V-1                                                         | 10                  | 80                                   | 1501.00                                   | 180                   | This work |

**Table S4** Organic dyes with different charge types and sizes.

| Dye                 | Formula                                                                             | Charge type | Size (nm × nm × nm) |
|---------------------|-------------------------------------------------------------------------------------|-------------|---------------------|
| Methylene Blue (MB) | 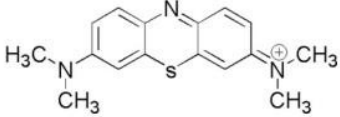 | Cationic    | 0.40 × 0.79 × 1.63  |
| Rhodamine B (RhB)   |  | Cationic    | 0.68 × 1.18 × 1.57  |
| Gentian Violet (GV) |  | Cationic    | 0.40 × 1.30 × 1.37  |
| Congo Red (CR)      |  | Anionic     | 0.39 × 0.86 × 2.61  |

**Table S5** The parameters of pseudo-second-order, intra-particle diffusion and Elovich models in C-N-1.

| Kinetic model                  | Parameters                                                | I <sub>2</sub> , 5 mL, 0.01 mol L <sup>-1</sup> |
|--------------------------------|-----------------------------------------------------------|-------------------------------------------------|
| Pseudo-second-order model      | q <sub>e</sub> (mg g <sup>-1</sup> )                      | 0.0025                                          |
|                                | k <sub>2</sub> (g mg <sup>-1</sup> min <sup>-1</sup> )    | 8.19 × 10 <sup>-4</sup>                         |
|                                | R <sup>2</sup>                                            | 0.9978                                          |
| Intra-particle diffusion model | k <sub>id</sub> (mg g <sup>-1</sup> min <sup>-1/2</sup> ) | 277.50                                          |
|                                | C (mg g <sup>-1</sup> )                                   | 160.95                                          |
|                                | R <sup>2</sup>                                            | 0.8198                                          |
| Elovich                        | β (g mg <sup>-1</sup> )                                   | 0.0013                                          |
|                                | α (mg g <sup>-1</sup> min <sup>-1</sup> )                 | 254.92                                          |
|                                | R <sup>2</sup>                                            | 0.9716                                          |

**Table S6** The parameters of pseudo-second-order, intra-particle diffusion and Elovich models in C-V-1.

| Kinetic model                  | Parameters                                                | I <sub>2</sub> , 5 mL, 0.01 mol L <sup>-1</sup> |
|--------------------------------|-----------------------------------------------------------|-------------------------------------------------|
| Pseudo-second-order model      | q <sub>e</sub> (mg g <sup>-1</sup> )                      | 0.0016                                          |
|                                | k <sub>2</sub> (g mg <sup>-1</sup> min <sup>-1</sup> )    | 8.12 × 10 <sup>-4</sup>                         |
|                                | R <sup>2</sup>                                            | 0.9985                                          |
| Intra-particle diffusion model | k <sub>id</sub> (mg g <sup>-1</sup> min <sup>-1/2</sup> ) | 367.83                                          |
|                                | C (mg g <sup>-1</sup> )                                   | 160.77                                          |
|                                | R <sup>2</sup>                                            | 0.7254                                          |
| Elovich                        | β (g mg <sup>-1</sup> )                                   | 0.0011                                          |
|                                | α (mg g <sup>-1</sup> min <sup>-1</sup> )                 | 333.64                                          |
|                                | R <sup>2</sup>                                            | 0.9552                                          |

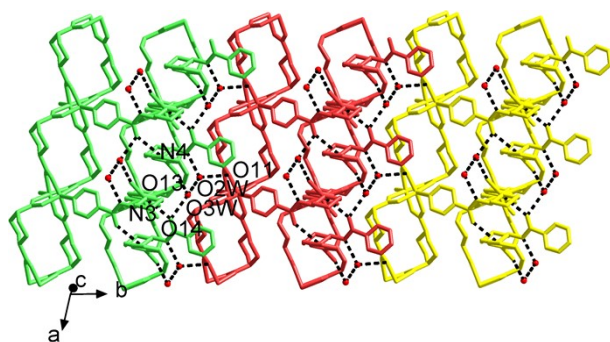

**Fig. S1** The 2D supermolecule layer of complex 1.

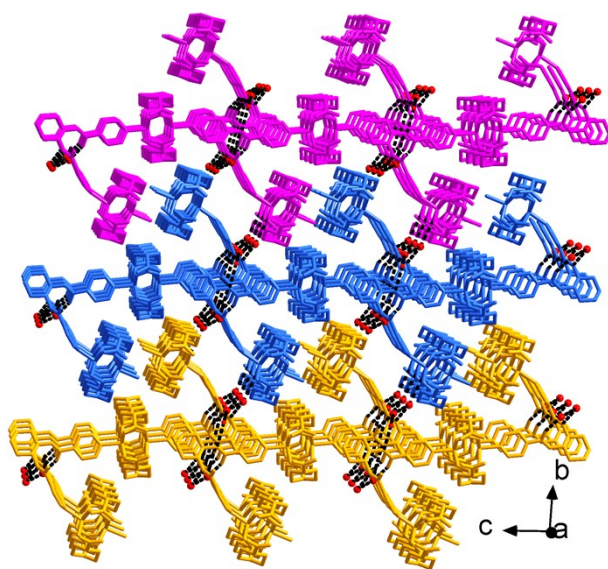

**Fig. S1** The 3D supermolecule network of complex 1.

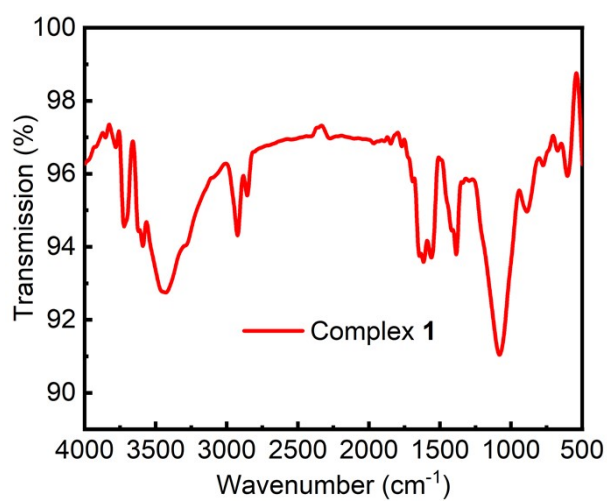

**Fig. S3** The IR spectrum of complex 1.

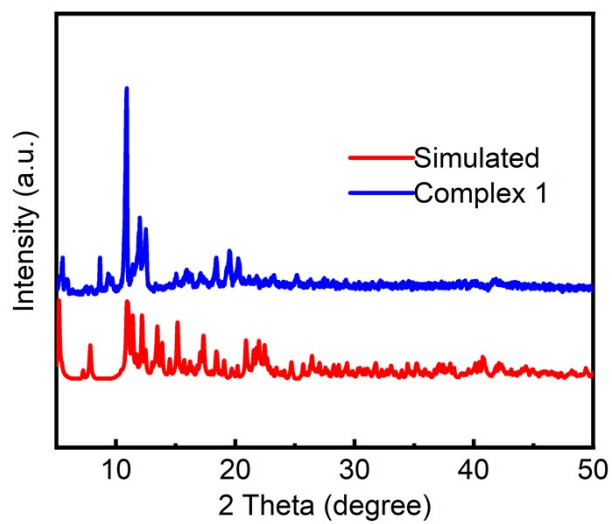

**Fig. S4** The PXRD patterns of complex 1.

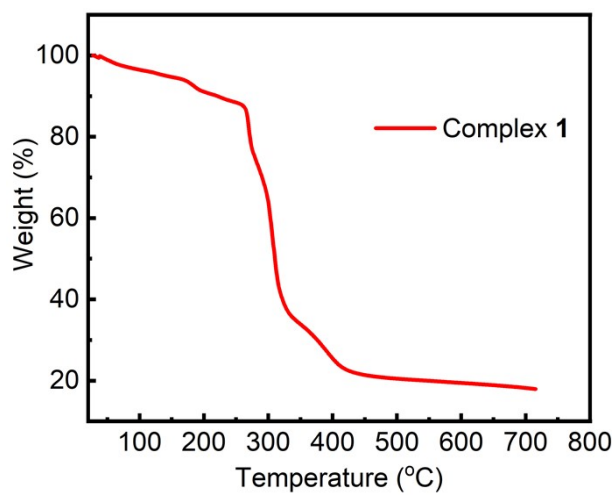

**Fig. S5** The TGA curve of complex 1.

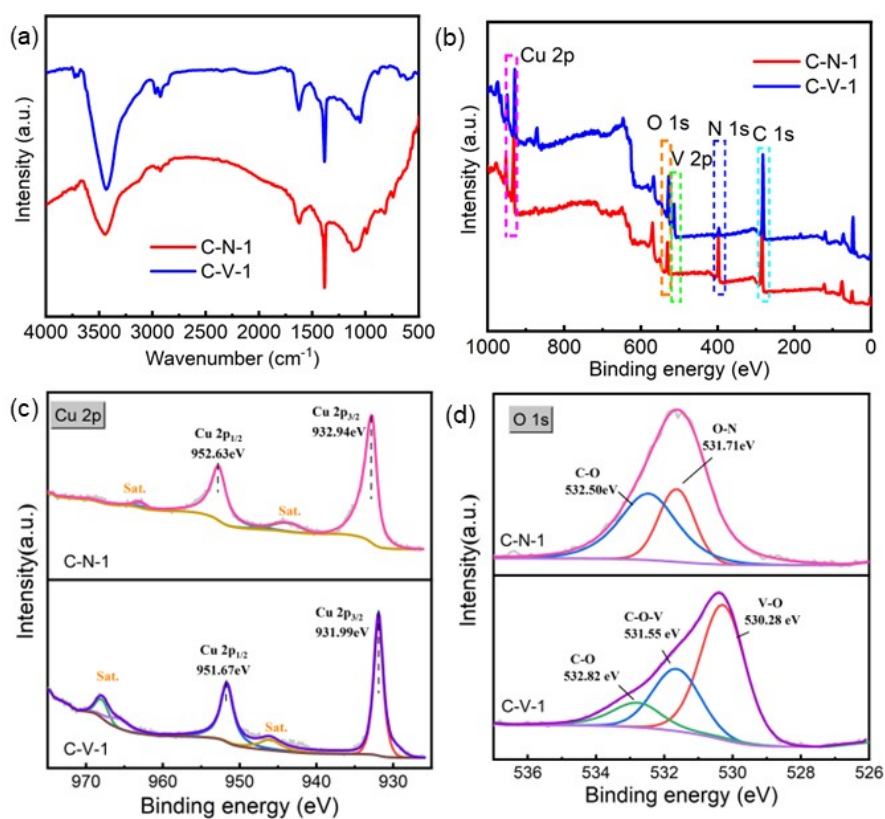

**Fig. S6** (a) FT-IR spectra of **C-N-1** and **C-V-1**. (b) Survey XPS spectra of **C-N-1** and **C-V-1**. High-resolution spectra of Cu 2p (c), and O 1s (d) for **C-N-1** and **C-V-1**.

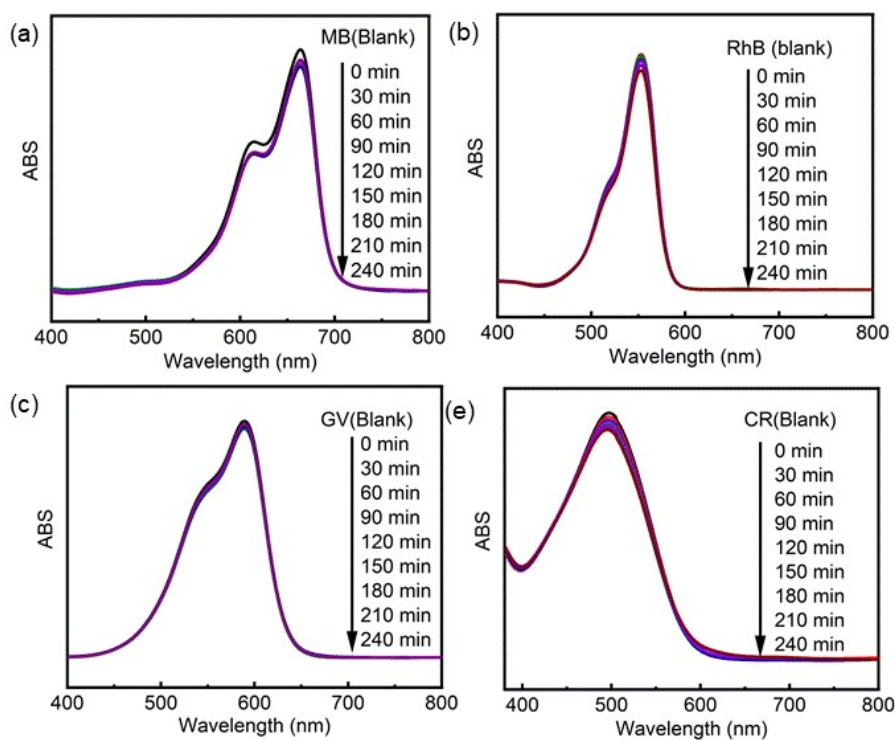

**Fig. S7** UV-Vis spectra of blank experiment for dye adsorption (performed in the

absence of any catalyst).

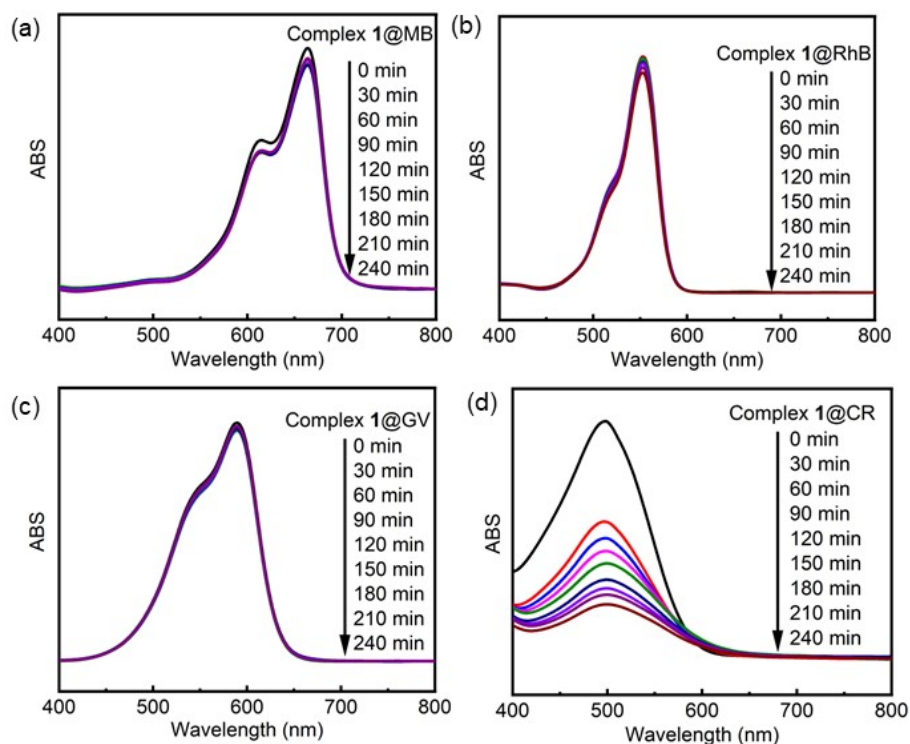

**Fig. S8** UV-Vis spectra of MB (a), RhB (b), GV (c) and CR (d) solutions recorded after different adsorption times with complex 1.

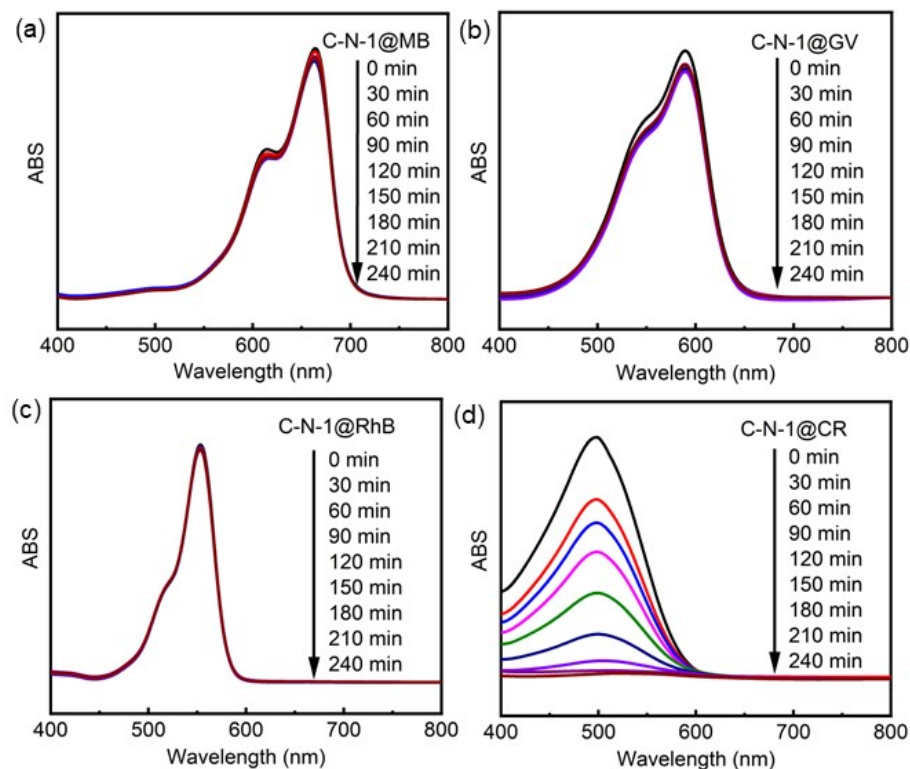

**Fig. S9** UV-Vis spectra of MB (a), RhB (b), GV (c) and CR (d) solutions recorded



after different adsorption times with C-N-1.

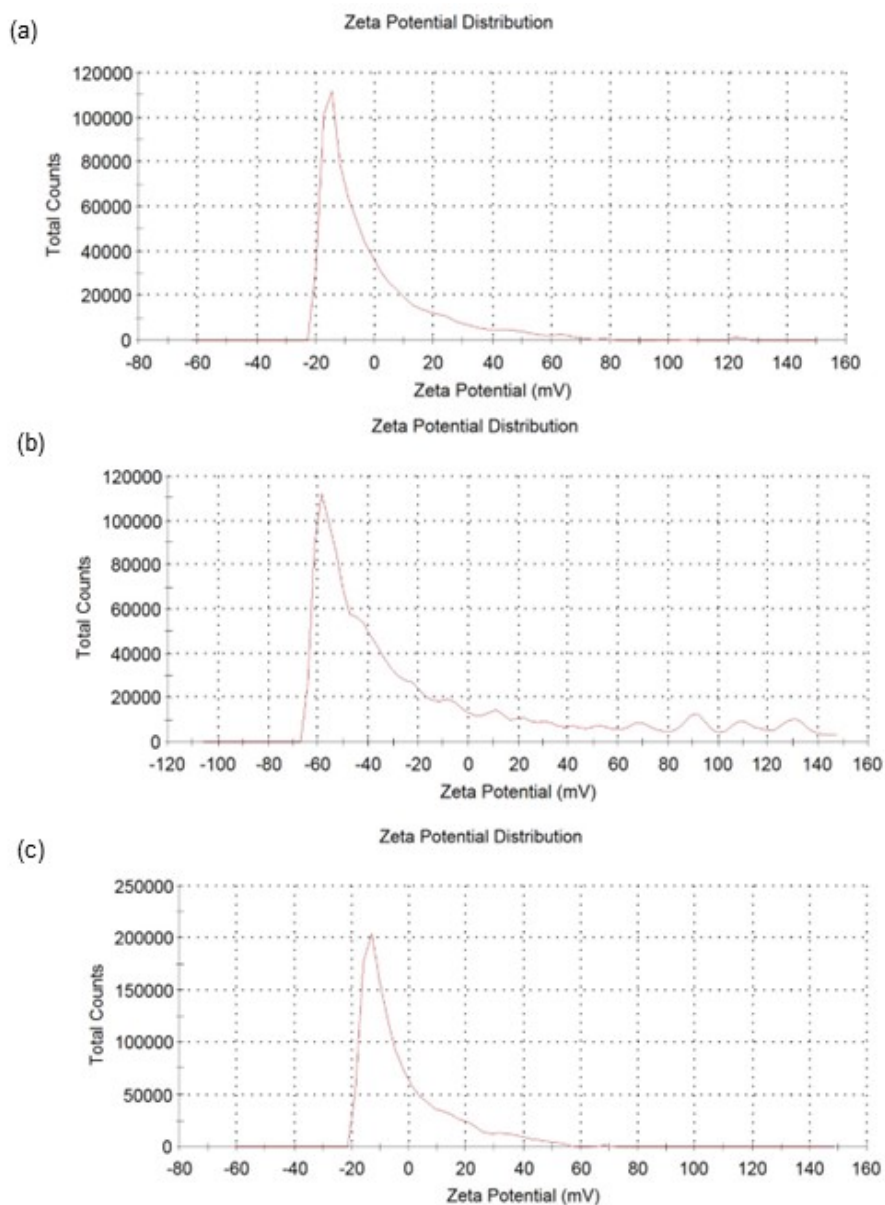

Fig. S10 The Zeta potential of complex 1 (a), C-N-1 (b), and C-V-1 (c).

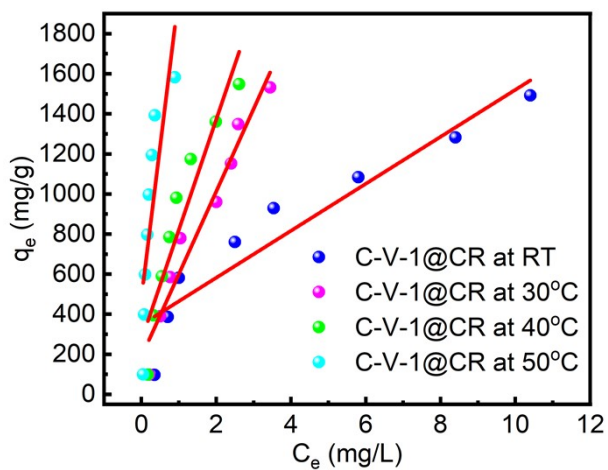

**Fig. S11** Effect of different temperatures on CR adsorbed by C-V-1.

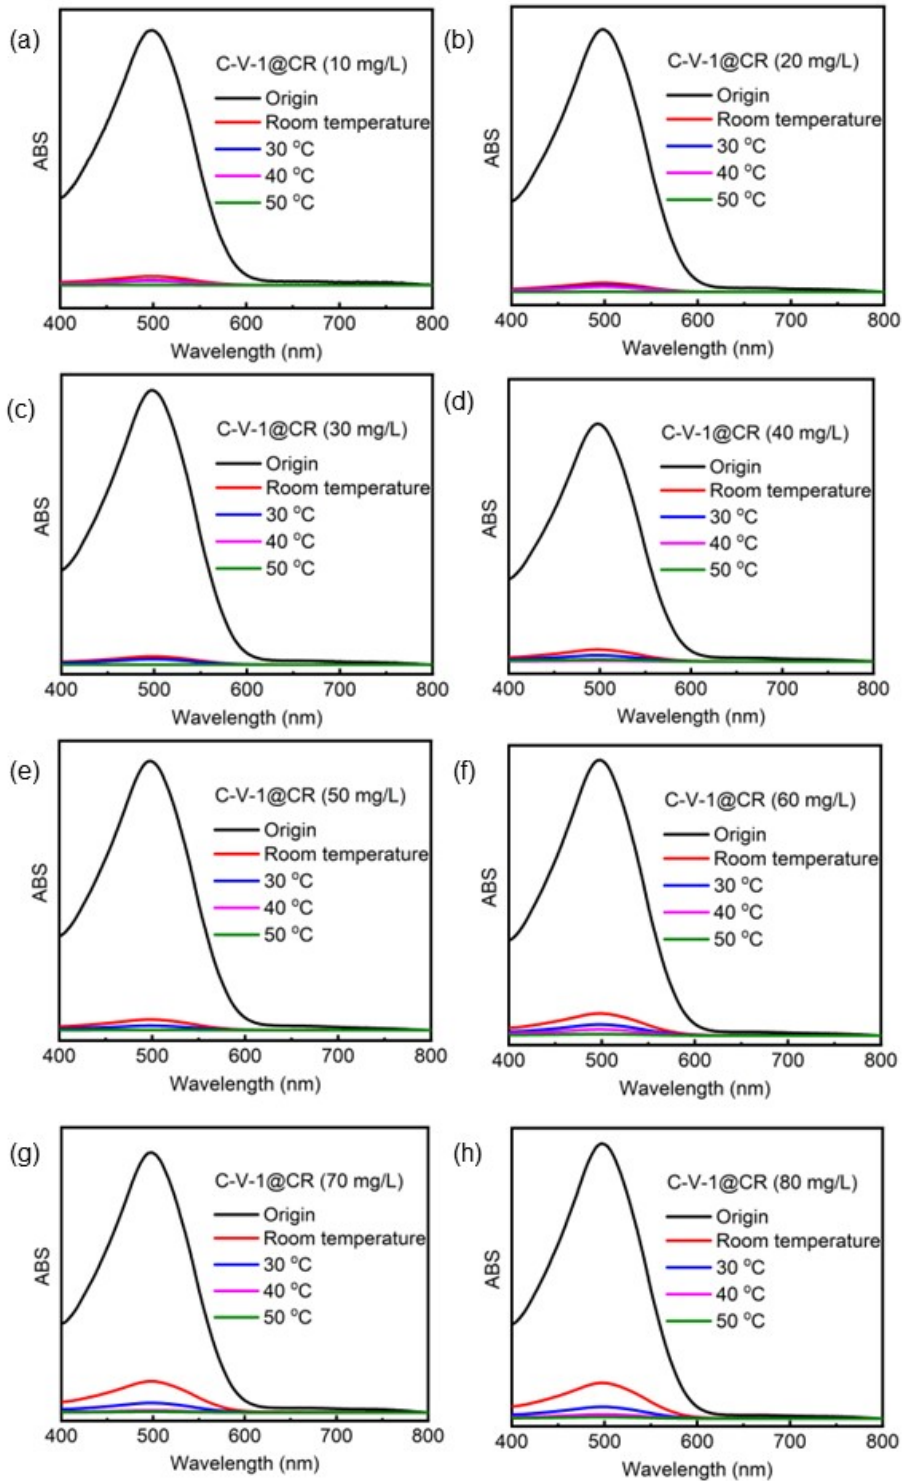

**Fig. S12** UV-vis spectra of different concentrations of CR solutions after 240 min with C-V-1 at different temperatures.

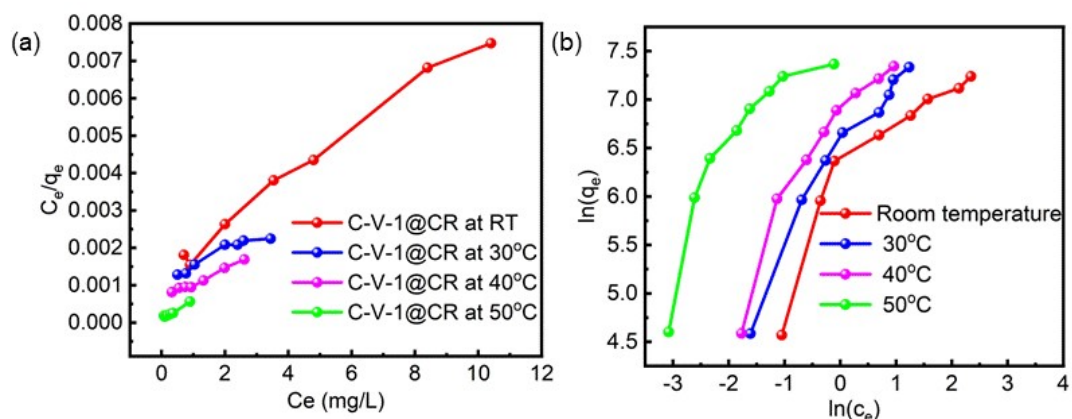

**Fig. S13** (a) The equilibrium plots for the adsorption CR on to the C-V-1 at 298, 303, 313, 323 K: Langmuir model equilibrium; (b) The equilibrium plots for the adsorption CR on to the C-V-1 at 298, 303, 313, 323 K: Freundlich model equilibrium plots.

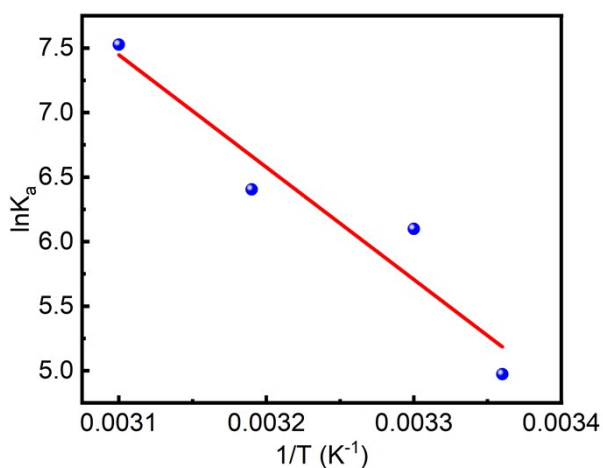

**Fig. S14** The plot of  $\ln K_a - 1/T$  for adsorption of CR on C-V-1.

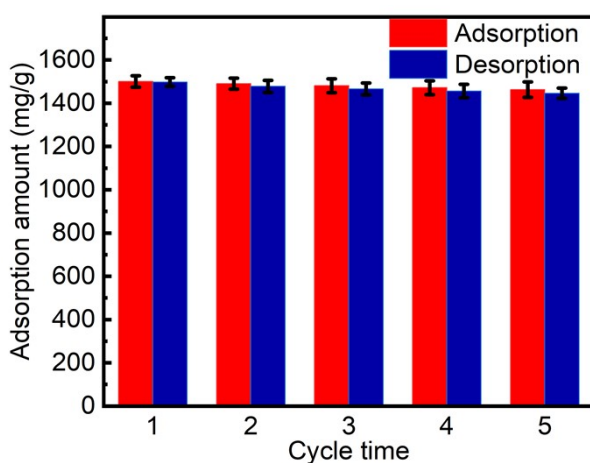

**Fig. S15** The cycling stability of the adsorption/desorption of CR on C-V-1.

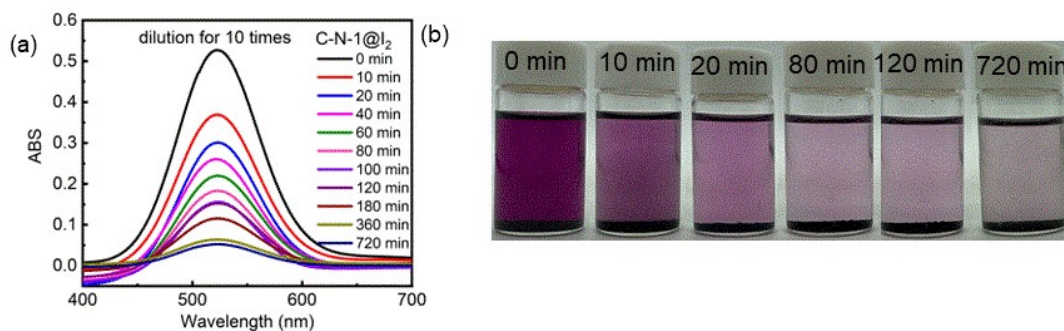

**Fig. S16** (a) The UV-Vis absorption spectra of **C-N-1** for the adsorption of  $I_2$ /cyclohexane solution (5 mL,  $0.005 \text{ mol L}^{-1}$ ) at 521 nm; (b) Gradual color change from dark purple to colorless by immersing **C-N-1** in  $I_2$ /cyclohexane solution (5 mL,  $0.005 \text{ mol L}^{-1}$ ).

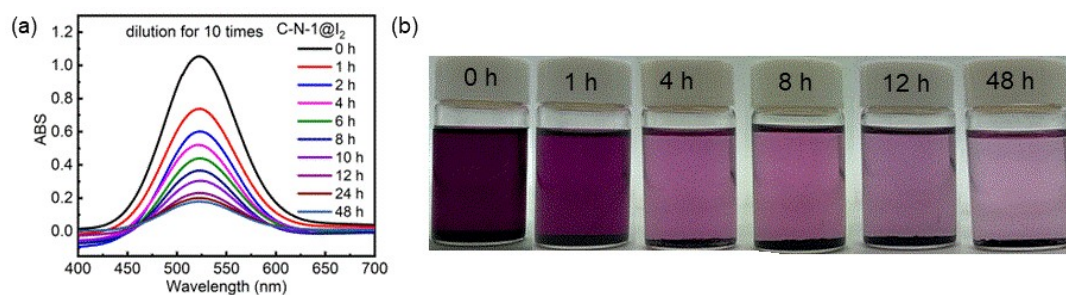

**Fig. S17** (a) The UV-Vis absorption spectra of **C-N-1** for the adsorption of  $I_2$ /cyclohexane solution (5 mL,  $0.01 \text{ mol L}^{-1}$ ) at 521 nm; (b) Gradual color change from dark purple to light pink by immersing **C-N-1** in  $I_2$ /cyclohexane solution (5 mL,  $0.01 \text{ mol L}^{-1}$ ).

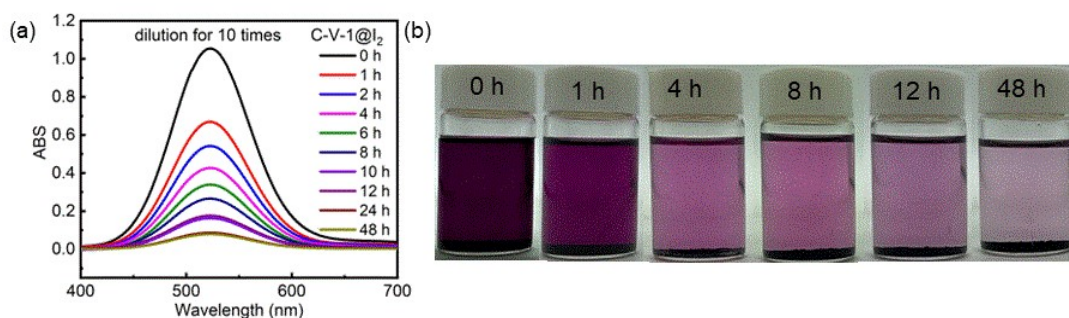

**Fig. S18** (a) The UV-Vis absorption spectra of **C-V-1** for the adsorption of  $I_2$ /cyclohexane solution (5 mL,  $0.01 \text{ mol L}^{-1}$ ) at 521 nm; (b) Gradual color change from dark purple to light pink by immersing **C-V-1** in  $I_2$ /cyclohexane solution (5 mL,  $0.01 \text{ mol L}^{-1}$ ).

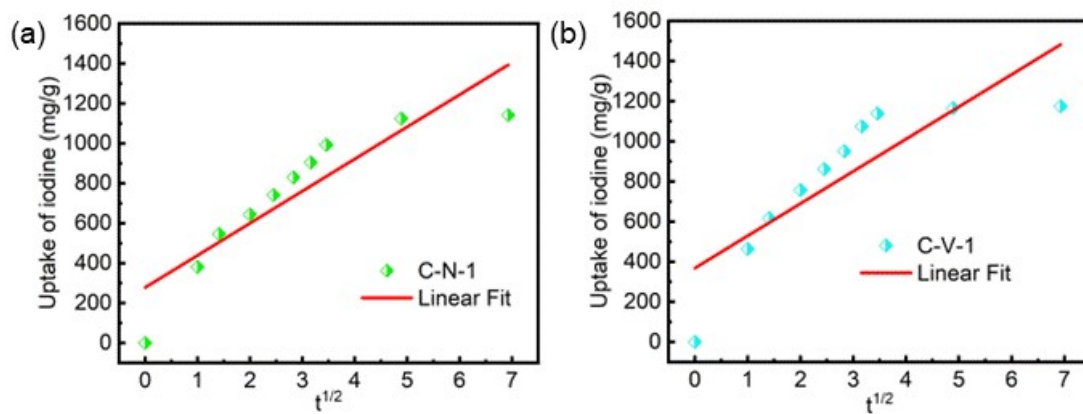

**Fig. S19** The intra-particle diffusion model of iodine on **C-N-1** (a) and **C-V-1** (b).

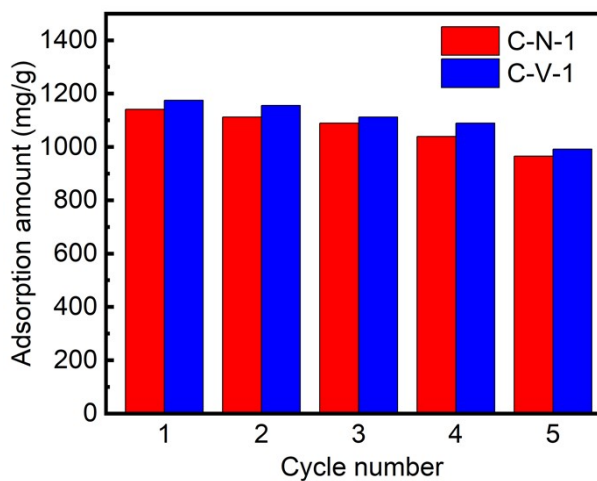

**Fig. S20** (a) The iodine adsorption during four consecutive runs over adsorbent **C-V-1** and **C-N-1**.

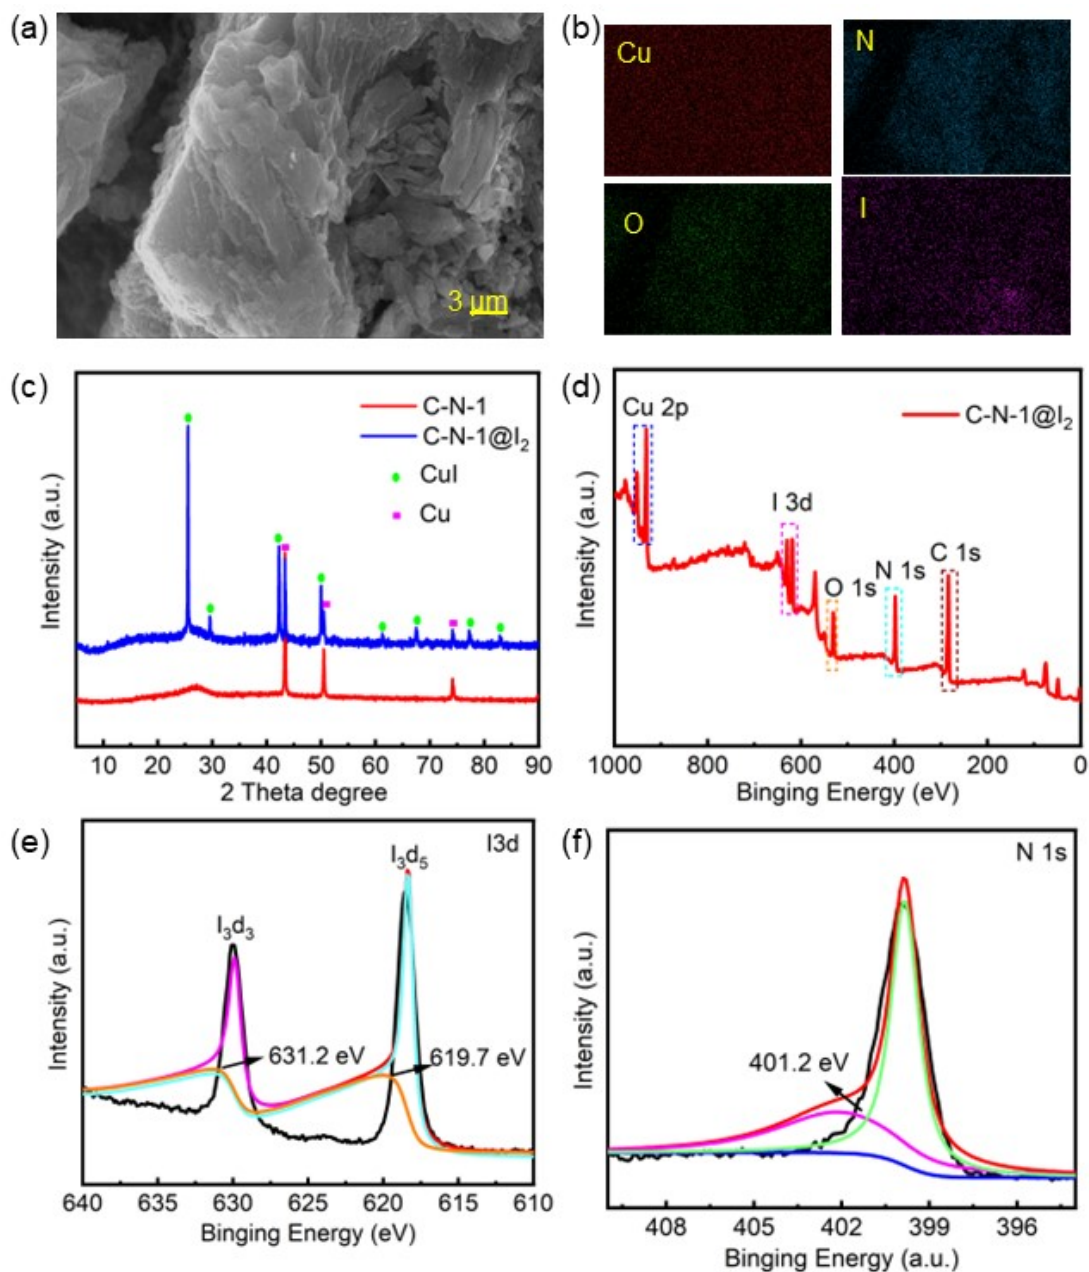

**Fig. S21** (a) SEM image of C-N-1; (b) EDS-mapping of C-N-1; (c) PXRD patterns of C-N-1 before and after Iodine adsorption; (d) XPS survey spectra after iodine for C-N-1; (e) XPS survey spectra of I 3d for C-N-1; (f) XPS survey spectra of N 1s for C-N-1.
